# Supplementary material for: ATR-16 syndrome: mechanisms linking monosomy to phenotype
Source: PubMed Central journal article supplement (PMC7279195; doi:10.1136/jmedgenet-2019-106528), 2020-01-31
Supplement: jmedgenet-2019-106528supp001.pdf [file jmedgenet-2019-106528supp001.pdf]

1 **Supplementary Information:**

2

3 **Case Reports**

4 Female JT had microcytic anaemia but was otherwise normal. She was  
5 found to have an interstitial deletion of 267.4 kb that arose *de novo* on the maternal  
6 chromosome and the breakpoint was mapped by FISH and Southern blotting before  
7 being characterised at the sequence level by inverse PCR and found to have  
8 occurred within an Alu repetitive element (Horsley et al., 2001).

9 Female OY had microcytic anaemia but was otherwise normal. Results  
10 of fluorescence *in situ* hybridisation (FISH) show she has a deletion on the paternal  
11 chromosome 16 which arose *de novo* and that the breakpoint lies within cosmid  
12 419C1 (Supplementary Table 1), revealing a truncation of ~308 kb. The breakpoint  
13 was refined by Southern blotting and identified by cloning and DNA sequencing of  
14 telomere-anchored amplification products. DNA sequence analysis shows telomeric  
15 repeats directly joined to the unique sequence (Figure 1). There is a 3 bp ambiguity,  
16 suggesting a minimal telomerase-binding site contributed to the stabilisation of this  
17 breakpoint by addition of a telomere. The last unique base is position 308,543 bp,  
18 interrupting the second intron of *AXIN1* (Figure 2). There are no repeats within 300  
19 bp either side of the break.

20 Female patient CS was initially referred at the age of 2 months because  
21 of an abnormal head shape, which was shown by three dimensional computed  
22 tomography scan of the skull to be associated with bicoronal craniosynostosis.  
23 Screening known craniosynostosis-associated genes by DNA sequencing and for  
24 copy number variation by MLPA revealed no pathogenic variants. However,  
25 genome-wide microarray analysis (Agilent ISCA 60K oligoarray) revealed a ~290 kb  
26 deletion, affecting 15 coding genes, between 36,766 bp and 328,247 bp on  
27 chromosome 16, which was found to have been inherited from the patient's  
28 unaffected father. CS was reported to have normal developmental milestones at the  
29 age of 8 months and there were no concerns raised about her eating, sleeping or  
30 any aspect of her behaviour. She attended normal preschool from the age of four  
31 and on follow-up at the age of 5 years there were no reported concerns about her  
32 development. Although the craniosynostosis in this patient is likely to be genetic in  
33 origin, given the absence of this phenotype in all other cases with 16p13.3 deletions,  
34 including her transmitting father, it is unlikely to be related to her chromosome 16

1 deletion; neither the patient nor her father have any abnormalities indicative of  
2 broader ATR-16 syndrome.

3 Male BF was reported found to have  $\alpha$ -thal trait and his deletion was  
4 identified by MLPA and characterised by low coverage WGS to be between 166,680  
5 bp and 342,681 bp (Heireman et al., 2019). This patient was one of six confirmed  
6 deletion carriers in this family, one of whom (Patient 6) has symptoms consistent  
7 with ATR-16 syndrome, however, this did not segregate with the deletion and the  
8 authors conclude this to be unrelated to the chromosome 16 deletion as the  
9 remaining carriers exhibited only  $\alpha$ -thalassemia.

10 Female CV (patient F in Coelho et al., 2010) presented with microcytic  
11 anaemia suspected of being  $\alpha$ -thalassemia and was found by MLPA to have a  
12 deletion of ~177 kb including the entire  $\alpha$ -globin locus and extending beyond the  
13 TMEM8A gene. This individual had no abnormalities beyond the  $\alpha$ -thalassemia.

14 Individual AB was referred with a suspected haemoglobinopathy and  
15 was found by MLPA to harbour a terminal chromosome 16p deletion of with a  
16 maximum extent of 400 kb (Harteveld et al., 2005). This patient was not reported to  
17 have any abnormalities beyond  $\alpha$ -thalassemia.

18 Male LA presented with  $\alpha$ -thalassemia with language delay and  
19 hypotonia. However, he has no developmental delay or skeletal abnormalities. This  
20 patient also has a brother who harbours the same deletion and has significant  
21 developmental delay including speech delay, reduced attention span, behavioural  
22 problems and seizures. Microarray analysis revealed this patient to have an  
23 interstitial deletion of ~408 kb.

24 Individuals TY(MI) and TY(Mi) are father and daughter respectively and have  
25 no abnormalities apart from  $\alpha$ -thalassemia. FISH suggests the 16p breakpoint lies  
26 within cosmid 338H10 (Supplementary Table 1), indicating a truncation of ~600 kb.  
27 The deletion was refined by Southern blotting and identified by Sanger sequencing  
28 of cloned telomere-anchored amplification products to be at 596,289 bp (Figure 1),  
29 in the second intron of *RAB40C* (Figure 2). The presence of telomeric repeats  
30 added directly to the breakpoint shows telomere mediated healing, however, there is  
31 no overlap at the breakpoint junction. The break occurs at a position 16 bp within  
32 the third iteration (of 6.5) of a 66 bp tandem repeat sequence. The repeat contains 2  
33 ORFs, one similar to alpha collagen the other similar to AHA1, activator of heat  
34 shock 90kDa protein ATPase homolog 2 (yeast). These repeats are not present  
35 elsewhere in the genome. There is a long tandem repeat similar to MLT1E1 or

1 MLT1E2 located 221 bp centromeric of the breakpoint and 366 bp telomeric of the  
2 break there is an LTR variant (L1ME3A). It is possible that the presence of these  
3 repeated sequences contributed to the chromosomal leading to this deletion.

4 Female YA had speech delay (no words by the age of 2 years) and her  
5 development was delayed by 6-12 months. She has some facial dysmorphism with  
6 mild frontal bossing, prominent eyes, flat nasal bridge, low set ears and  
7 macroglossia. She also had short stature, inverted nipples, supernumerary nipples  
8 and a bifid uvula. YA showed evidence of microcytic anaemia and because of this  
9 she was referred to our laboratory for genetic testing. FISH studies showed a  
10 deletion at the tip of chromosome 16 with breakpoint at ~750 kb (between cosmid  
11 clones C444G9 and C335H7 – Supplementary Table 1). The maternal  
12 chromosomes appeared normal, however, as the father was lost to follow-up  
13 parental origin could not be established. High-resolution microarray refined the  
14 breakpoint to ~747,840 bp (Supplementary Figure 3) ~5 kb 5' of the *MSLN* gene in  
15 an area containing L1MB7 and L1MB8 LINE repeats and AluSx and AluSq/x SINE  
16 repeats that are likely to have contributed to the rearrangement.

17 Female patient BA was previously reported (Daniels et al., 2001) to have no  
18 physical abnormalities but does have speech delay and a lack of spatial awareness  
19 and visual memory. Cloning and DNA sequencing of telomere-anchored  
20 amplification products shows the breakpoint to be at 762,272 bp (Figure 1)  
21 disrupting the *MSLNL* gene by removing the last four exons. The break appears to  
22 be have been healed by telomerase as TAACCC repeats are immediately adjacent  
23 to the breakpoint and there is a potential 1 bp overlap. The break occurred at a  
24 position 65 bp into an AluY repeat, which may have contributed to an instability in  
25 this region.

26 Male patient GZ had surgery to repair pyloric stenosis shortly after birth and  
27 had persistent microcytic anaemia, however, there was no developmental delay nor  
28 any other abnormalities related to ATR-16 syndrome (Harteveld et al., 2007). MLPA  
29 revealed this patient to have a terminal deletion with a maximum extent of 900,907  
30 bp with the breakpoint disrupting the *LMF1* gene.

31 Individuals TN(Pe) and TN(AI) are brothers and TN(Pa) is their mother. All  
32 three affected family members suffered from mild intellectual delay and  
33 developmental delay (6 months to 1 year delayed speech and walking). This family  
34 have been previously reported (Daniels et al., 2001), however, in this work we have  
35 identified the breakpoint using monochromosomal somatic cell hybrid mapping

1 followed by DNA sequencing of telomere anchored amplification products to reveal  
2 the lesion to be at 966,713 bp, (Figure 1). We also show that this deletion arose *de*  
3 *nov*o on the maternal allele in Tn(Pa). The break interrupts the third exon of the  
4 *LMF1* gene (Figure 2) with no repeats in the vicinity. The break appears to have  
5 been healed by telomerase as there are TAACCC repeats joined with 3 bp of  
6 overlap suggesting a minimal telomerase recognition site which facilitated the  
7 telomere mediated healing (Figure 1). Whole genome sequencing of all three  
8 affected individuals revealed no rare coding polymorphisms on the extant  
9 chromosome 16 allele. However, all three affected individuals harboured a R12X  
10 variant in *SMAD6*, a gene which has previously been associated with developmental  
11 delay with variable penetrance.

12 The five individuals designated with the prefix F are from a Brazilian family  
13 reported in 2008 who were found to harbour a deletion of ~931 kb identified by  
14 MLPA (Bezerra et al., 2008). This deletion disrupted the *SOX8* gene and none of  
15 the family members showed any of the broader phenotypic abnormalities of ATR-16  
16 syndrome. This was the first reported case that showed haplo-insufficiency for  
17 *SOX8* in humans doesn't cause phenotypic abnormalities.

18 Female patient GIB was initially presented with a mild hypochromic microcytic  
19 anaemia and the presence of HbH inclusions (Gibson et al., 2008). Developmental  
20 delay was diagnosed at the age of 2 years, however, she did not have any  
21 dysmorphic features at this stage. By the age of 6 years craniofacial abnormalities  
22 were reported including a high forehead, flattening of the maxilla and a high nasal  
23 root and bridge together with up-slanting palpebral fissures. Intellectual abilities  
24 were reported as being around the 4<sup>th</sup> centile. Together these features are all typical  
25 of the broader ATR-16 phenotype. Microarray and FISH analyses showed a *de novo*  
26 interstitial deletion of ~900 kb in the subtelomeric region of chromosome 16p13.3  
27 likely to be responsible for causing the abnormalities present in patient Gib.

28 Patient SH(Pa) exhibited motor delay throughout childhood, he had an IQ of  
29 48 when tested and has facial dysmorphism including micrognathia, maxillary  
30 hypoplasia and a high, arched palate. He also has skeletal abnormalities including  
31 clinodactyly, tapering fingers with narrow nails, a short 4<sup>th</sup> metacarpal, intoed gait,  
32 pes planus and genu valgus. Other abnormalities include crypto-orchidism and a  
33 hypoplastic scrotum. Monosomy for 16p13.3 was identified by FISH, with the break  
34 being found to be between clones C349E11 and C344F5, (Supplementary Table 1)  
35 and subsequently refined by Southern blotting and inverse PCR to obtain the

1 breakpoint sequence. This revealed the rearrangement to be an interstitial AluY  
2 mediated 1,098,548 bp deletion (between ~34037 bp to ~1132584 bp), the  
3 breakpoints of which do not directly disrupt a gene (Figure 2). Because this deletion  
4 is mediated by Alu repeats there is 38 bp of overlapping sequence, making it is  
5 impossible to define the precise breakpoint (Figure 1). However, minor variations in  
6 the repeat sequence allow the last unique bases on either side of the deletion to be  
7 determined (asterisks in Figure 1). The telomeric break removes the most distal  
8 gene on 16p13.3 (*POLR3K*) and the proximal break occurs between the *C1QTNF8*  
9 and *CACNA1H* genes (Figure 3). Interestingly this breakpoint appears to be  
10 mediated by the same AluY element associated with the interstitial deletion in JT  
11 (see Figure 2) suggesting this locus may be particularly prone to rearrangement.

12 Male NL was diagnosed with  $\alpha$ -thalassemia at the age of 9 years, there were  
13 no signs of mental retardation, he followed a normal school education and had  
14 normal developmental milestones. At present he is 19 years of age and studies law  
15 and plays soccer in his local team. MLPA and subsequently microarray analysis  
16 (Phylipsen et al., 2012) showed this patient to have a distal deletion of ~1.14 Mb  
17 with the breakpoint falling between *C1QTNF8* and *CACNA1H* (Figure 2). This  
18 deletion is slightly larger than that identified in family SH, surprisingly, however, it is  
19 not associated with any abnormalities apart from  $\alpha$ -thalassemia.

20 A large terminal deletion of at least 1 Mb was identified in case DO by Wilkie  
21 and colleagues (Wilkie et al, 1990) using Southern blotting. This patient has  
22 craniofacial abnormalities including hypertelorism, a prominent nasal bridge, a high  
23 palate with crowded upper teeth and a small chin. Skeletal examination was normal  
24 (apart from short stature) but she had a marked speech delay, having a very limited  
25 vocabulary at the age of five years.

26 Male patient CJ had a birth weight of 3.2 kg and was initially referred for  
27 genetic testing because of developmental delay, speech delay and slow cognitive,  
28 social and motor development at 14 months of age. He exhibited a range of  
29 dysmorphic features including a high, broad forehead, a long and flat midface, a  
30 high narrow palette, retrognathia, micrognathia and downturned palpebral fissures.  
31 Skeletal abnormalities included bilateral hallux valgus and bilateral clinodactyly of  
32 the 5<sup>th</sup> finger. He had a systolic ejection heart murmur. Because CJ was found to  
33 have microcytic anaemia in combination with these abnormalities a possible  
34 diagnosis of ATR-16 was pursued. FISH studies revealed an interstitial deletion of  
35 the terminal region of chromosome 16 shown by absence of probes intervening the

1 telomeric cosmid CRA36 and proximal cosmid C399E4 (Supplementary Table 1).  
2 The deletion in this patient was refined by high-resolution microarray, which  
3 revealed it to be between ~120,000 bp and ~1,357,000 bp on chromosome 16  
4 (Supplementary Figure 3) giving a total deletion size of ~1.15 Mb (Figure 2).

5 Female patient MY had a birth weight of 2.7 kg, she initially fed poorly  
6 although her health improved following surgical repair of an atrial septal defect.  
7 MY's heart defect is unlikely to be linked to the ATR-16 syndrome as her sister also  
8 had an atrial septal defect yet did not inherit monosomy for chromosome 16p13.3,  
9 although this cannot be excluded. MY also has plagiocephaly and mild telecanthus  
10 and hypertelorism. She had delayed speech and mild delay to her physical  
11 development (the patient walked at 18 months of age). Results of FISH with 16p  
12 cosmids suggest the breakpoint lies between cosmids 399E4 and 312E8  
13 (Supplementary Table 1), indicating terminal deletion of approximately 1.4 Mb.  
14 Southern blotting followed by cloning and DNA sequencing of telomere-anchored  
15 amplification products showed the break occurred at 1,408,561 bp (Figure 1),  
16 between two tandem AluSx SINE repeats, flanked by the *C16orf91* and *UNKL*  
17 genes (Figure 2). There is a rearrangement at the breakpoint with complex deletion  
18 of part of the AluSx repeat (Supplementary Figure 2). Telomeric sequence is joined  
19 directly to the breakpoint with a 2 bp overlap, suggesting telomerase mediated  
20 healing (Figure 1).

21 Female BAR was diagnosed with  $\alpha$ -thalassemia by the identification of HbH  
22 inclusions at the age of 7 years. She was found to have inherited the  $-\alpha 3.7$  deletion  
23 from her mother on one allele and MLPA and subsequently microarray analysis  
24 revealed an interstitial deletion from ~0-23,949 bp to ~1,461,124 bp had arisen *de*  
25 *novo* on the other allele (Figure 2 and Supp. Fig 3). BAR had no phenotypic  
26 abnormalities beyond her  $\alpha$ -thalassemia.

27 Male patient SCH was referred with at the age of 8 years with HbH disease to  
28 a normal mother and a father a haematological profile with  $\alpha^+$ -thalassemia (Scheps  
29 et al., 2016). In his neonatal period, he required hospitalisation for respiratory  
30 distress and hypotonia. He also showed developmental delay and other dysmorphic  
31 craniofacial features and abnormalities of the hands and lower limbs (Scheps et al.,  
32 2016). FISH, SNP-array and MLPA revealed this patient to have an interstitial  
33 deletion of ~1.2 Mb.

34 Male patient PV had developmental delay at the age of 2, at the age of 11 he  
35 was noted to have mildly dysmorphic craniofacial features, his trunk showed pectus

1 excavatum and hyperlaxity of his joints was observed (Harteveld et al., 2007). MLPA  
2 revealed this patient to have a terminal deletion with a maximum extent of ~1.7 Mb  
3 (Harteveld et al., 2007).

4 Female patient FT was referred at the age of 30 years because of mild  
5 microcytic hypochromic anaemia. In infancy it was noted she had a developmental  
6 delay (Harteveld et al., 2007). At the age of 31 examination revealed craniofacial  
7 abnormalities and abnormalities of the hands and feet including clinodactyly and  
8 lateral deviation. MLPA revealed a large deletion of 16p13.3 with a maximum extent  
9 of ~1.9 Mb.

10 Male patient BO had a small head, mild ptosis, a small mouth and a long  
11 filtrum and bilateral talipes equinovarus (reviewed in Wilkie et al., 1990). The  
12 breakpoint was refined by Wilkie and colleagues and subsequently identified as a  
13 terminal deletion of ~1.9 Mb (Lamb et al., 1993).

14 Male patient HN was reported by Harteveld and colleagues (Harteveld et al., 2007).  
15 At the age of 10 months he had delayed motor development and hypotonia. Speech  
16 delay was reported at the age of 30 months and at 3 years he was found to have an  
17 active language delay. He also had typical facial features associated with ATR-16  
18 including downslanting palpebral fissures, mild hypertelorism, abnormal ears. His  
19 skeletal defects were mild with only a club foot (left) and a flat foot (right) reported.  
20 MLPA revealed this patient to have a large deletion of a 1.9 Mb.

21 The phenotypic abnormalities of female patient IM have previously been  
22 reported (Daniels et al., 2001; Fei et al., 1992; Felice et al., 1984). Briefly, she was  
23 found to have microcytic anaemia at the age of 5 months, her growth was slow and  
24 motor retardation was noted by the age of 1 year. IM was later reported to have to  
25 suffer developmental delay (behaving like a 5 year old at the age of 8), however, her  
26 language and adaptive development were considered normal. IM has mild facial  
27 dysmorphism (tall forehead and macrodontia) and bilateral clubbed feet that were  
28 surgically corrected in early childhood. Previous studies performed Southern blotting  
29 (Fei et al., 1992) and FISH (Daniels et al., 2001) to refine the deletion, here we  
30 conduct high-resolution microarrays that reveal a large terminal deletion of  
31 chromosome 16 with the breakpoint at ~2,011,646 bp. The relatively mild  
32 phenotypic abnormalities seen in this patient are surprising given the relatively large  
33 deletion of chromosome 16 identified.

34 Female patient LIN had expressive speech delay and developmental delay  
35 that has been described previously (Lindor et al., 1997). She has a degree of facial



1 dysmorphism including a tall, broad forehead and a broad nasal root and midface  
2 retrusion. Previous FISH studies identified a terminal deletion of chromosome 16  
3 with the breakpoint ~ 2 Mb from the telomere (Daniels et al., 2001). In this study we  
4 further refined the deletion using Southern blotting and identified the junction  
5 fragment by DNA sequencing of telomere anchored amplification products to be at  
6 2,013,658 bp (Figure 1). The breakpoint is flanked by the genes *NPW* and  
7 *SLC9A3R2* (Figure 2). There is a short region of subtelomeric sequence of  
8 unspecified chromosomal origin between the break and the telomeric repeats  
9 suggesting a recombination-based mechanism may have stabilised the  
10 chromosomal breakage in this case (Figure 1). The lack of skeletal abnormalities  
11 seen in LIN is surprising given that the deletion is over 2 Mb.



## 1 **Supplementary Methods**

2

### 3 Genes and Assay Numbers Used in Quantification of Gene Expression

4 *POLR3K* (Hs00363121\_m1), *C16orf33* (Hs00430677\_m1), *C16orf35* custom assay  
5 (Forward; CAACGCCCTCAGCTTTGG, Reverse; GCTGGTGAGGGTCATGTCATC, Probe;  
6 CCCCAACCAGCAGC), *LUC7L* (Hs00216077\_m1), *AXIN1* (Hs00394718\_m1), *MRPL28*  
7 (Hs00371771\_m1), *TMEM8* (Hs00430491\_m1), *NME4* (Hs00359037\_m1), *DECR2*  
8 (Hs00430406\_m1), *Rab11FIP3* (Hs00608512\_m1) *ACTB* (Hs99999903\_m1). Two custom  
9 assays were obtained from Eurogentec (www.uk.eurogentec.com): *MPG* (Forward; 5'-  
10 GCATCTATTTCTCAAGCCCAAAG-3', Reverse; 5'-GGAGTTCTGTGCCATTAGGAAGTC-  
11 3', Probe; 5'-AGTTCTTCGACCAGCCGGCAGTCC-3') and *C16orf9* (Forward; 5'-  
12 GGCGGCCCGTTCAAG-3', Reverse; 5'-GAGCCCACAAGAAGCACA-3', Probe; 5'-  
13 TCCCAGGGAACGCCGGTG-3'). Analysis was performed using the comparative  $C_T$  Method  
14 ( $\Delta\Delta C_T$ ) (Livak et al., 2001). Data in Figure 3A were obtained by amplification and Sanger  
15 sequencing of informative polymorphisms from genomic DNA and cDNA.

16

### 17 Microarray Analysis

18 DNA from patient LA was tested using an 8 x 60K SurePrint G3 custom CGH + SNP  
19 microarray (Agilent) and analysed using Agilent Cytogenomics software 4.0. Genomic DNA  
20 from patients NL and BAR was analysed using a custom fine tiling array covering the alpha-  
21 and beta-globin gene clusters and surrounding areas was used (Roche NimbleGen,  
22 Madison, WI, USA). Array design was based on NCBI Build 36.1 (hg18) and used as  
23 previously described (Phylipsen et al., 2012). Genomic DNA from patients SH(Ju) and  
24 SH(Pa) was tested using CytoScan HD arrays (Affymetrix) and analysed using Karyoview  
25 software. Microarray analysis was performed with genomic DNA from patients CJ, IM and  
26 YA using the Sentrix Human CNV370 BeadChip (Illumina) and analysed using  
27 GenomeStudio software. DNA from patient CS was analysed using the Agilent ISCA  
28 (International Standards for Cytogenomic Arrays) 60K oligoarray.

29

1

2 **Supplementary Figures**

## Supplementary Figure 1

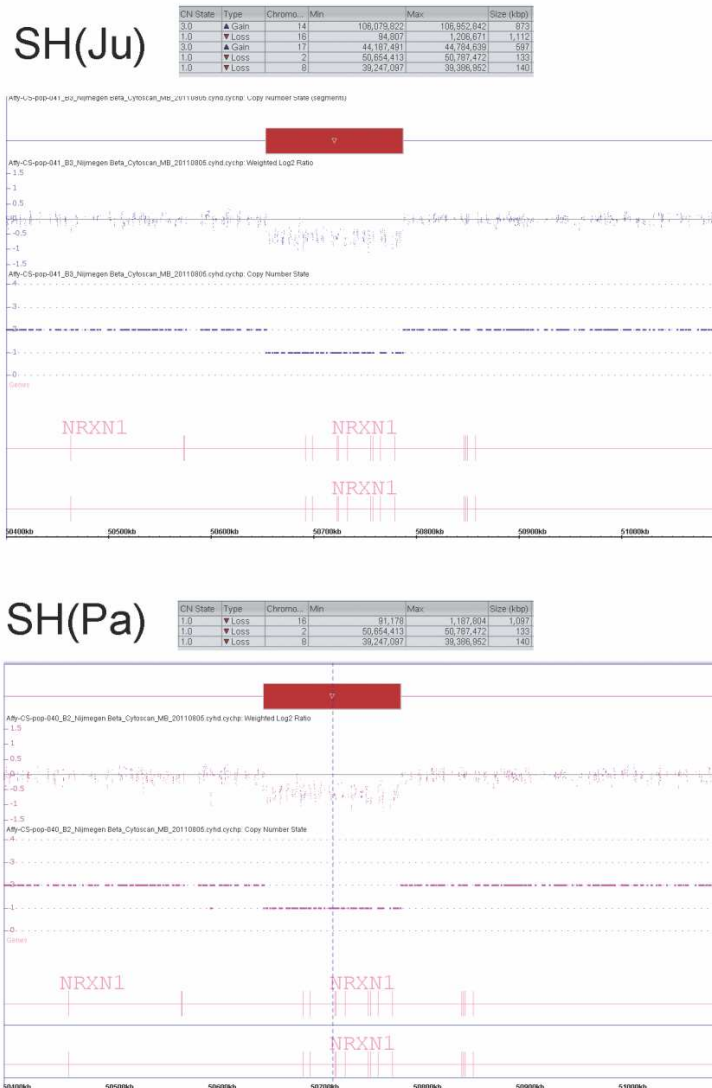

3

4 **Supplementary Figure 1:** Copy number variations (CNVs) identified in SH(Ju) and  
 5 SH(Pa). Tables show CNVs called by Affymetrix Cytoscan software and figures  
 6 below show the log<sub>2</sub> ratio of probes and the copy number state for the chromosome  
 7 2 deletion encompassing exons 5 to 13 of *NRXN1*. Both individuals also harbour  
 8 deletions of chromosomes 8 and 16. The chromosome 8 deletion disrupts the  
 9 pseudogene *ADAM5* and *tMDC* encoding uncharacterised protein  
 10 ENSP00000328747. The chromosome 16 deletion underlies the ATR-16 syndrome  
 11 in these patients.



1

## Supplementary Figure 3

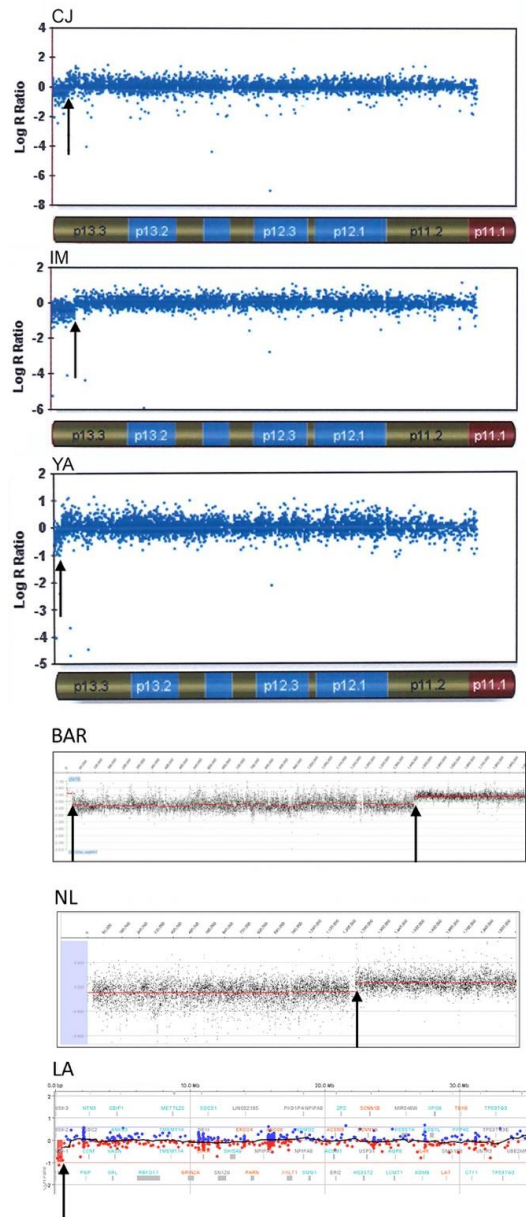

2

3

4 **Supplementary Figure 3:** Microarray data from patients CJ, IM, YA, BAR, NL and

5 LA showing the LogR ratios of individual probes, arrows indicate loci at which

6 analysis software identified the breakpoints.

7

8

9

10

1

2 **Supplementary Figure 4**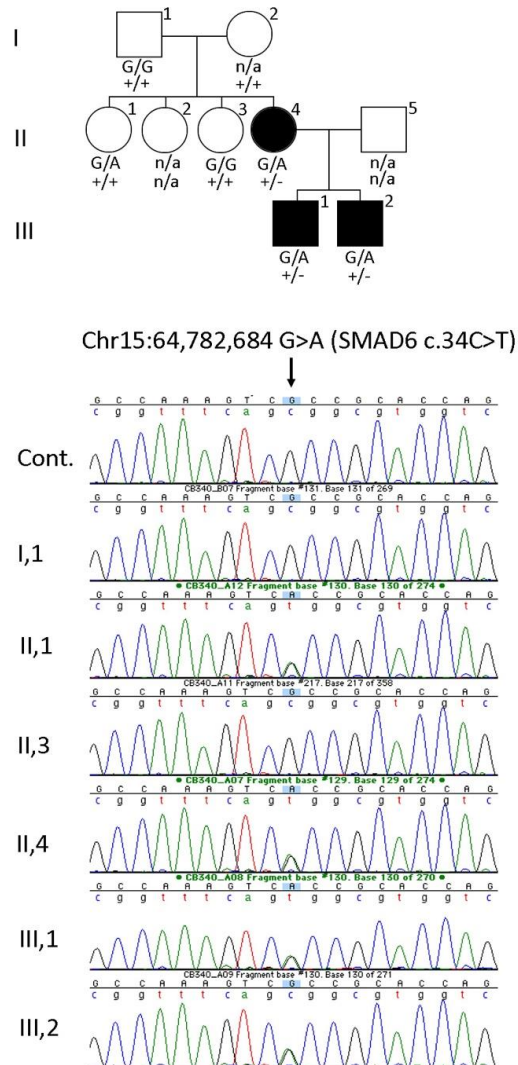

3

4 **Supplementary Figure 4.** Identification of SMAD6 change in Family TN. Affected  
 5 family members are shown with filled symbols and unaffected individuals are  
 6 represented with open symbols. Below each symbol the genotype at  
 7 chr15:64,782,684 is written on the upper line, G is reference and A is the variant  
 8 leading to the R12X nonsense change in *SMAD6*. The lower line of text indicates  
 9 the ATR-16 deletion in this family, + indicates an intact chromosome 16 and –  
 10 indicates the deleted allele. Because two siblings carry the *SMAD6* variant this is  
 11 likely to have been inherited from the grandmother (I,2). Coinheritance of these  
 12 variants may have led to the relatively severe ATR-16 abnormalities present in this

- 1 family. The lower part of the figure shows chromatograms for a control individual
- 2 (Cont.) and family members as indicated.

**Supplementary Table 1 FISH Probes**

| Probe             | Coordinates        | OY  | TY  | SH | MY | LIN | YA | CJ |
|-------------------|--------------------|-----|-----|----|----|-----|----|----|
| Telomere Assay    | na                 | N   | nd  | nd | N  | nd  | N  | N  |
| <b>16p cosmid</b> |                    |     |     |    |    |     |    |    |
| CRA36             | 52706-99963 bp     | -   |     |    |    |     |    | +  |
| HSGG4             | 97541-111766 bp    |     | -   |    | -  |     | -  |    |
| HSGG1             | 129137-172194 bp   | -   | -   |    | -  |     | -  | -  |
| Cos12             | 158777-203194 bp   |     | -   |    |    |     |    | -  |
| C314G4            | 243192-285276 bp   | -   |     |    |    |     |    |    |
| C419C1            | 265315-316860 bp   | +/- | -   |    |    |     |    | -  |
| C338B10           | 297847-340834 bp   | +   |     |    |    |     |    |    |
| C415C1            | 332201-381990 bp   | +   |     |    | -  |     |    |    |
| C356B8            | 485020-530746 bp   | +   |     |    |    |     |    |    |
| C366D1            | 521427-565641 bp   |     | -   |    |    |     |    |    |
| C407A10           | 557634-598294 bp   |     | -   |    |    |     |    |    |
| C338H10           | 580029-610790 bp   |     | +/- |    | -  |     |    |    |
| C398G5            | 594663-640361 bp   | +   | +   |    |    |     |    |    |
| C444G9            | 708336-751169 bp   |     |     |    |    |     | -  |    |
| C335H7            | 737067-783265 bp   |     |     |    |    |     | +  |    |
| C360B4            | 851308-895707 bp   |     |     |    | -  |     |    |    |
| C313F9            | 1025418-1072203 bp | +   |     |    |    |     |    |    |
| C349E11           | 1068736-1111710 bp |     |     | -  | -  |     |    | -  |
| C344F5            | 1122769-1160074 bp |     |     | +  |    |     |    |    |
| C320E12           | 1172104-1208298 bp |     |     |    |    |     |    | -  |
| C399E4            | 1359308-1404844 bp |     |     |    | -  |     |    | +  |
| C312E8            | 1395863-1429931 bp |     |     |    | +  |     |    |    |
| C305C8            | 1461998-1505438 bp | +   |     |    | +  |     |    | +  |
| C371H6            | 1755695-1799062 bp |     |     |    | +  |     |    |    |
| C439A6            | 1882600-1923854 bp | +   |     |    |    |     |    |    |
| 910O19            | 1965888-2004708 bp |     |     |    |    | +/- |    |    |
| 1308N18           | 1996694-2036573 bp |     |     |    |    | +   |    |    |
| 2171017           | 2038309-2078584 bp |     |     |    |    | +   |    |    |

Presence of signals on both chromosome 16 homologues is indicated by "+", "-" indicates signal absent on one chromosome 16 homologue, "+/-" indicates weaker signal on one homologue compared to the other. The top row indicates patients who were analysed for subtelomeric rearrangements using a telomere assay (Knight et al., 1997 and Horsley et al., 2001): N, no rearrangement; nd, not done; na, not applicable.



**Supplementary Table 2** Oligonucleotides used to clone breakpoints

| Patient | Forward primer                   | Reverse primer               |
|---------|----------------------------------|------------------------------|
| SH      | 5'-AGATACATGCTCCCAGTCTCA-3'      | 5'-CGTATATCTGGTCTCTATCTTC-3' |
| OY      | 5'-CAAAGCACGCATCCATAGGC-3'       | 5'-CCCTAACCCCTGACCCTAACCC-3' |
| LN      | 5'- GCAGAGGGAGAGCAGGTCTCAG-3'    | 5'-CCCTAACCCCTGACCCTAACCC-3' |
| MY      | 5'- CTGAAGGACTTGGCTGGTGGAT-3'    | 5'-CCTAACCCCTGACCCTAACCC-3'  |
| BA      | 5'-GAGCAAAGTACACAACTGGGTGAC-3'   | 5'-CCTAACCCCTGACCCTAACCC-3'  |
| TN      | 5'-AACTGGCCTTGTCTGTGCCTTAAGCT-3' | 5'-CCCTAACCCCTGACCCTAACCC-3' |
| TY      | 5'-CCTACCACCAGCAAGAACGGA-3'      | 5'-CCTAACCCCTGACCCTAACCC-3'  |

**Supplementary Table 3** Deleterious Chromosome 16 Variants

| Patients*        | Gene <sup>#</sup> | Variant <sup>%</sup> | Identifier <sup>^</sup> | Freq <sup>\$</sup> | ANNOVAR <sup>@</sup> |
|------------------|-------------------|----------------------|-------------------------|--------------------|----------------------|
| TN(AI, Pa, Pe)   | MRPL28            | H27Y                 | rs3194151               | 11%                | 3/6                  |
| TN (AI,Pe)       | PICQ              | G523S                | rs7187227               | 14%                | 3/6                  |
| TN(AI) YA        | PICQ              | T14A                 | rs2071979               | ~49%               | 2/6                  |
| TN(AI, Pa,Pe) YA | POLR3K            | S24A                 | rs3194151               | 100%               | 2/6                  |
| TN(Pa)           | PDIA              | T286M                | rs2685127               | 8%                 | 3/6                  |
| TN(Pa)           | CHTF              | S63F                 | rs2277902               | 5%                 | 1/6                  |
| (Pa)             | PRR25             | T92S                 | rs1005190               | 41%                | 1/6                  |
| YA               | NPRL3             | R158fs               | rs35963490              | 33%                | 6/6                  |
| YA               | RGS11             | G499A                | rs9806942               | 15%                | 3/6                  |
| YA               | RHOT              | R425C                | rs3177338               | 33%                | 3/6                  |
| YA               | RHOT              | R245Q                | rs1139897               | 33%                | 2/6                  |
| YA               | RGS11             | T728C                | rs739999                | 31%                | 1/6                  |
| YA               | WDR90             | H899Q                | rs45613635              | 34%                | 1/6                  |

\*Codes for patients harbouring each of the changes listed are shown in this column.

<sup>#</sup>Gene symbols are used. <sup>%</sup> Effects of variants on coding sequence. <sup>^</sup>The unique identifier from dbSNP is listed for each variant. <sup>\$</sup> Allele frequencies as a population average, data from dbSNP. <sup>@</sup> The pathogenicity of each variant was given a custom deleterious score based on a six-point scale, (Fu et al., 2013) calculated using output from ANNOVAR (Wang et al., 2010).

**Supplementary Table 4.** Shared novel variants in 3 affected members of family TN

| Chr <sup>#</sup> | Position (bp) | Gene     | Variant <sup>§</sup> | ANNOVAR <sup>%</sup> | Associated abnormalities <sup>^</sup>                               |
|------------------|---------------|----------|----------------------|----------------------|---------------------------------------------------------------------|
| 1                | 1336598       | PRAMEF27 | Q144R                | 1/6                  | na                                                                  |
| 1                | 26671545      | CRYBG2   | L524fs               | 6/6                  | na                                                                  |
| 2                | 71190373      | ATP6V1B1 | R331W                | 4/6                  | Renal tubular acidosis with progressive nerve deafness.             |
| 3                | 141163642     | ZBTB38   | K804N                | 5/6                  | Potential role in human height variation (nearby GWAS association). |
| 4                | 17061677      | CLCN3    | A290S                | 4/6                  | Loss of hippocampus in mouse KO.                                    |
| 5                | 179068881     | C5orf60  | splicing             | 6/6                  | na                                                                  |
| 8                | 125052168     | FER1L6   | G837D                | 3/6                  | na                                                                  |
| 11               | 1018248       | MUC6     | T1518I               | 2/6                  | Gastric cancer                                                      |
| 11               | 62293804      | AHNAK    | F2695L               | 2/6                  | Neuroblastoma                                                       |
| 13               | 103718412     | SLC10A2  | K63fs                | 6/6                  | Chrohn's disease, bile malabsorbtion.                               |
| 14               | 33014538      | AKAP6    | L227V                | 5/6                  | na                                                                  |
| 15               | 66995630      | SMAD6    | R12X                 | 6/6                  | Aortic Valve Disease, Craniosynostosis, developmental delay.        |
| 19               | 59010556      | SLC27A5  | V483M                | 6/6                  | na                                                                  |
| 20               | 5170758       | CDS2     | P406A                | 4/6                  | na                                                                  |

<sup>#</sup>Chromosome. <sup>§</sup>The effect of each variant on the protein is shown. <sup>%</sup>The custom pathogenicity score attributed to each variant (see Supp Table 3 notes). <sup>^</sup>Annotation present in the OMIM database associated with each gene, na indicates no information in OMIM. The pathogenicity of each variant was given a custom deleterious score based on a six-point scale, (Fu et al., 2013) calculated using output from ANNOVAR (Wang et al., 2010).
